# Supplementary material
Source: publisher figshare collection journal article supplement (https://gsapubs.figshare.com/ndownloader/files/22759760)
Supplement: Supplementary file 1 [file 22759760]

**Online Supplementary Material for:**

**Rapid Early Cambrian rotation of Gondwana-Land**

*Ross N. Mitchell, David A.D. Evans, and Taylor M. Kilian*

**This file contains:**

Supplementary text

Supplementary figures (Fig. DR1, DR2, DR3, DR4)

Supplementary tables (Table DR1 and DR2)

Supplementary references

**SUPPLEMENTARY TEXT**

**Discussion of Gondwana-Land paleomagnetic compilation.** In their study of the Itabaiana mafic dikes, Trindade et al. (2006) provide a reasonably comprehensive review of the highest quality paleomagnetic poles from the Gondwana-Land constituents. Our pole list (Table DR2, Fig. 3) largely reflects theirs. We now discuss those poles included or excluded herein that are excluded or included, respectively, in their study.

A major difference between our pole list and that of Trindade et al. (2006) is their choice to include the numerous poles presented by Klootwijk (1980) from Australia (from oldest to youngest): Hawker Group, Pertaoorta Group, Kangaroo Island, Billy Creek, Giles Creek, and Lower Lake Frome. We do not include the Klootwijk (1980) poles because they pre-date the application of principal-component analysis (Kirschvink, 1980), and rely on contour plots for distinguishing presumed primary versus secondary

components. It is worth noting that Klootwijk's results do indicate a major declination shift, as we find.

The only result that Trindade et al. (2006) include from Antarctica is from the Sør Rondane intrusions. We exclude Sør Rondane pole because of the large uncertainty of its age, which is estimated from a compilation of U-Pb zircon, Rb-Sr biotite, Rb-Sr whole rock, and Ar/Ar biotite (Grunow, 1995). We tentatively include poles from the Zanuck granite, and from the Wyatt and Ackerman Formations and Mount Paine tonalite (Grunow and Encarnacion, 2000), although we recognize the possibility that they maybe allochthonous to Gondwana-Land at the time of emplacement (Grunow and Encarnacion, 2000; Paulsen et al., 2007). Zanuck granite is well-dated, with cooling estimates for the magnetite blocking temperature range between emplacement age of  $521 \pm 2$  Ma (Encarnacion and Grunow, 1996) (which we use for pole age) and an argon closure age for biotite (i.e., cooling to  $300^{\circ}\text{C}$ ) by  $496 \pm 3$  Ma (Grunow and Encarnacion, 2000). The Zanuck granite pole yields a Van der Voo (1990) reliability Q-value of 4. The combined pole from the Wyatt and Ackerman Formations and Mount Paine tonalite (Grunow and Encarnacion, 2000) yields a Q-value of 6. A Pb/Pb age of  $526 \pm 2$  Ma on zircons from an ash bed within the Wyatt Formation provides a tight, concordant age constraint (Encarnacion and Grunow, 1996).

We follow Trindade et al.(2006) in the selection of the Ntyona ring structure, Sinyai metadolerite, Madagascar virgation zone, and Carion granite poles for Africa. Finally, for South America we include Itabaiana dikes pole and two from Sierra de las Animas Complex. Although Itabaiana dikes poles is highly reliable ( $Q=7$ ), its baked contact test is inconclusive due to a lack of a stable host rock direction away from dike

margins. We exclude poles from Equeefa dikes and Mzumbe gneiss because of large errors ( $524 \pm 36$  Ma;  $2\sigma$  standard error from original data). Other Cambrian South American poles from Trindade et al. (2006) (C7, C8, C9, C11) are magmatic overprints with imprecise ages. Refer to Table DR2 for Q-values and references for all poles considered in Figure 3.

## SUPPLEMENTARY FIGURES

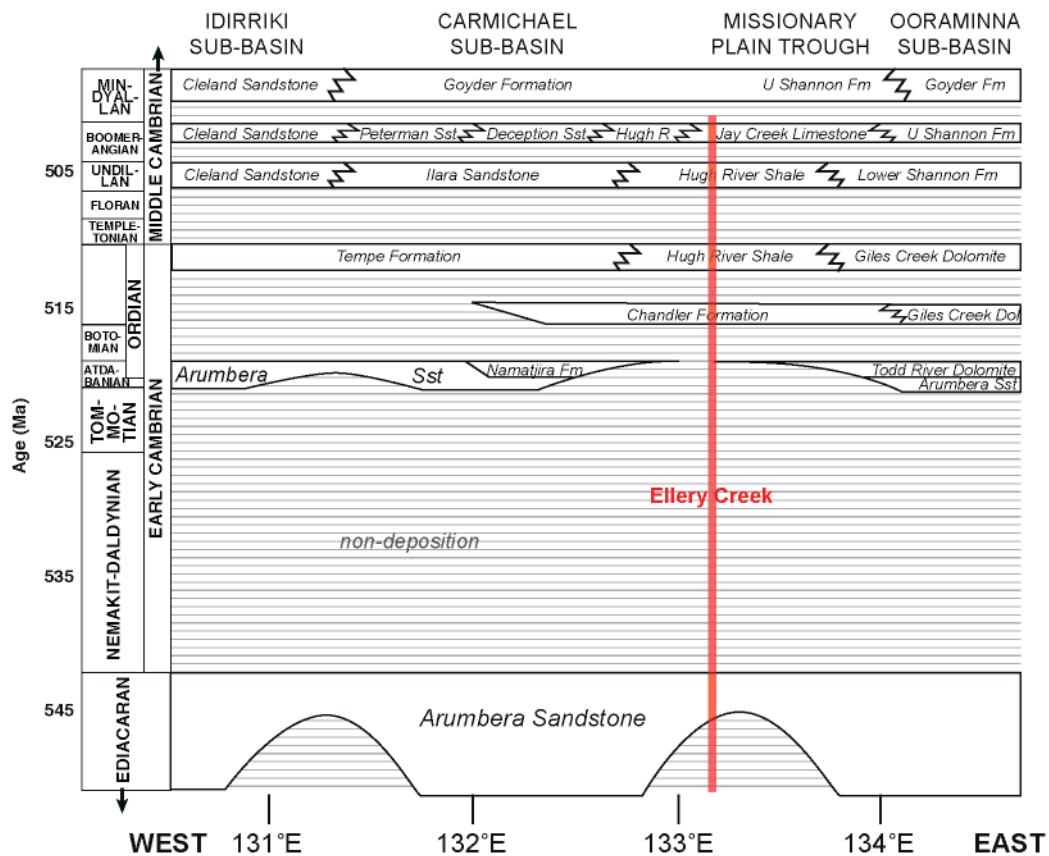

**Fig. DR1** Cambrian sequence stratigraphy of the Amadeus Basin showing age ranges of units sampled: upper Arumbera sandstone, Hugh River Shale, and Jay Creek Limestone. Modified after Kennard and Lindsay (1991) and Gravestock and Shergold(2001) according to revised time scale (Maloof et al., 2005). The evaporitic Chandler Formation,

although present at 133°-133.5°E elsewhere in the Amadeus Basin, is not exposed at Ellery Creek.

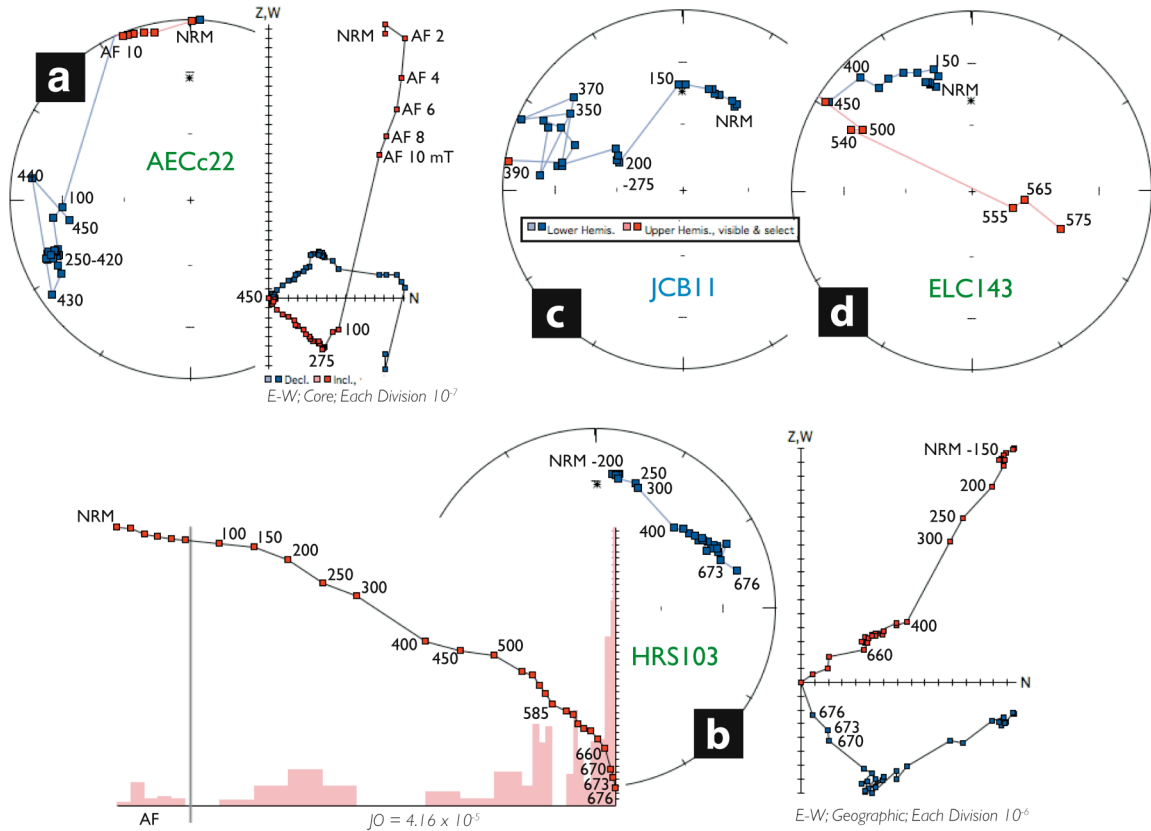

**Figure DR2.** Example equal area, orthogonal, and normalized intensity ( $J/J_0$ ) demagnetization projections for (A, B, and D) the Hugh River Shale and (C) the Jay Creek Limestone. See text for a description of the various levels of data quality represented above and employed in the study.

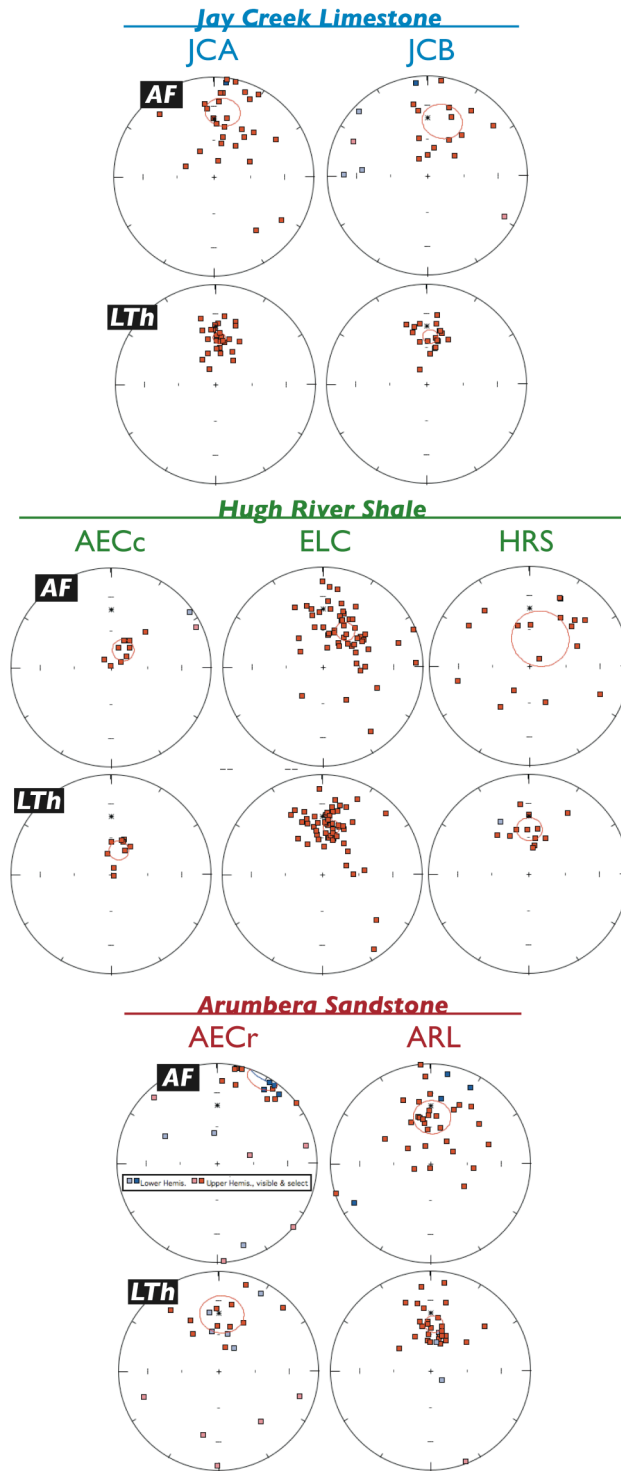

**Figure DR3.** Equal area projections of low-stability components determined for each site and formation. Components are determined by both demagnetization techniques (used in tandem on all samples) alternating-field (AF) and low thermal demagnetization (LTh).

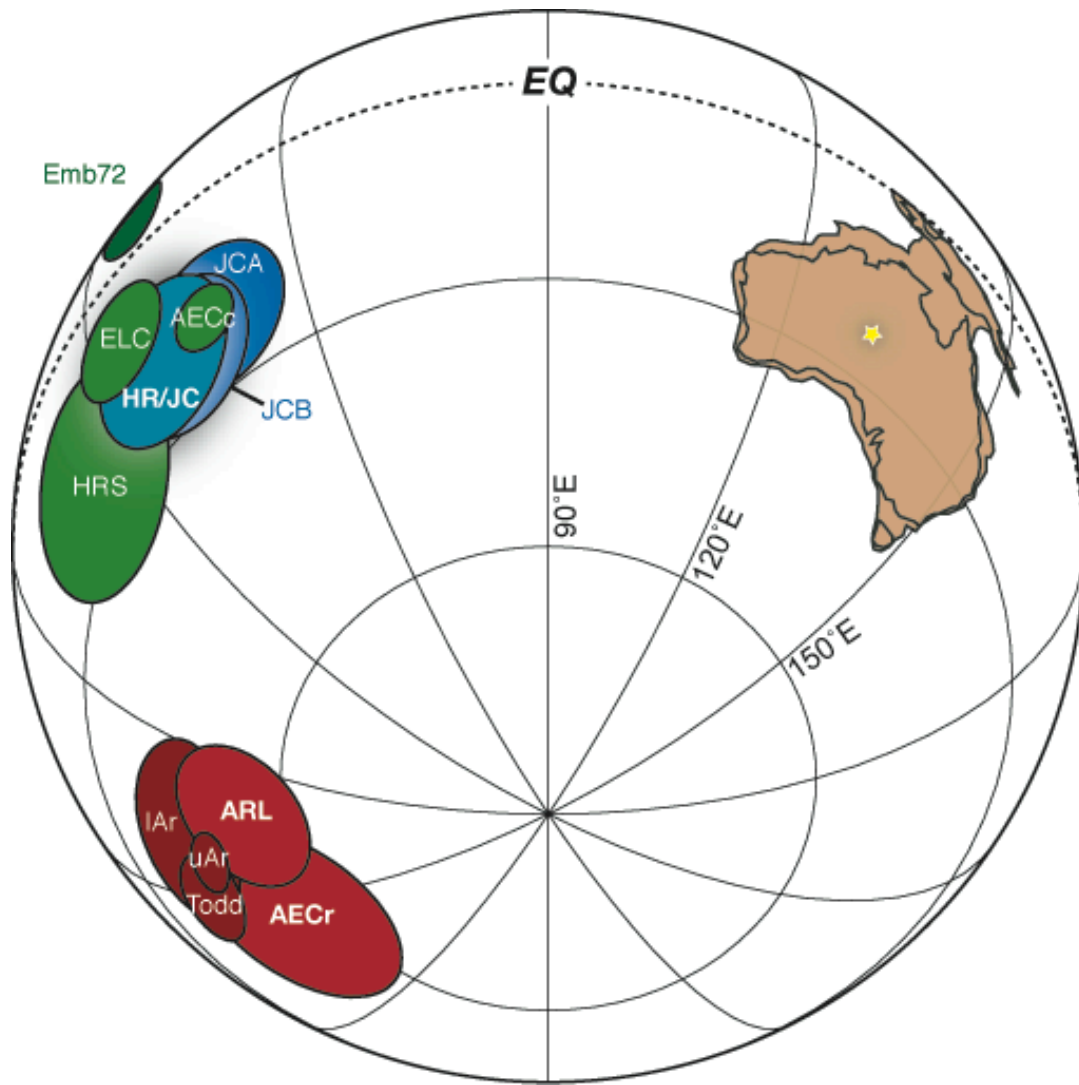

**Figure DR4** Paleomagnetic poles from Ellery Creek section. HR/JC is mean paleomagnetic pole from HRS, ELC, JCB, JCA, and AECc from Hugh River Shale and Jay Creek Limestone of this study. ‘Emb72’ (dark green) is preliminary pole from Hugh River Shale (Embleton, 1972). lAr, uAr, and Todd are poles from lower and upper Arumbera Sandstone and Todd River Dolomite as exposed at Ross River (Kirschvink, 1978). Plot in present-day Australia coordinates. Star indicates sampling locality.

#### SUPPLEMENTARY TABLES

**Table DR1. Calculated mean palaeomagnetic directions in this study and plotted in Fig. 3. ID = identification refers to text, Dec = declination, Inc = inclination, a95 = radius of circle of 95% confidence, n = samples, Site = latitude and longitude of sampling site, Pole = latitude and longitude of palaeomagnetic pole, A95 = radius of circle of 95% confidence of palaeomagnetic pole,  $\lambda$  = palaeolatitude,  $\pm$  = uncertainty of palaeolatitude.**

| ID    | Dec (°) | Inc (°) | a95 (°) | n     | Site (°N) | Site (°E) | Pole (°N) | Pole (°E) | A95 (°) | $\lambda$ (°) | $\pm$ |
|-------|---------|---------|---------|-------|-----------|-----------|-----------|-----------|---------|---------------|-------|
| ARL   | 199.9   | -13.1   | 12.1    | 23.0  | -23.8     | 133.1     | -53.9     | 348.1     | 8.8     | -6.6          | 6.4   |
| AECr  | 185.6   | -11.4   | 17.6    | 12.0  | -23.8     | 133.1     | -59.9     | 324.3     | 12.7    | -5.8          | 9.3   |
| AECc* | 253.3   | 21.5    | 5.2     | 7.0   | -23.8     | 133.1     | -19.6     | 46.9      | 4.0     | 11.1          | 2.9   |
| ELC*  | 256.1   | -5.3    | 10.0    | 50.5  | -23.8     | 133.1     | -11.6     | 34.9      | 7.1     | -2.7          | 5.1   |
| HRS*  | 241.3   | -15.4   | 17.9    | 17.0  | -23.8     | 133.1     | -22.3     | 23.1      | 13.2    | -7.8          | 9.7   |
| JCA*  | 253.1   | 23.6    | 12.1    | 21.0  | -23.8     | 133.0     | -20.2     | 47.9      | 9.4     | 12.3          | 7.0   |
| JCB*  | 249.8   | 14.5    | 13.0    | 15.0  | -23.8     | 133.5     | -21.4     | 42.2      | 9.5     | 7.4           | 6.9   |
| HR/JC |         |         |         | 110.5 |           |           | -19.3     | 39.1      | 10      |               |       |

\*Averaged for HR/JC mean pole.

**Table DR2. List of paleomagnetic poles according to craton and position in Gondwana-Land. ID = identification refers to text, Plat and paleomagnetic pole latitude and longitude, respectively, PlatR and Plong = rotated paleomagnetic pole latitude and longitude, respectively, into Northwest Africa Gondwana-Land reference frame according to McElhinny et al. (2003), A95 = radius of circle of 95% confidence, Distance = calculated great circle distance from Wyatt paleomagnetic pole. Ages for biostratigraphically-dated units employ time scale of Maloof et al. (2005). Q-value is paleomagnetic reliability value (Van der Voo, 1990).Explanation of paleomagnetic pole choices are explained in the supplementary text.**

| Rock Unit by Continent and Sector          | ID     | Plat<br>(°N) | Plong<br>(°E) | PlatR<br>(°N) | PlongR<br>(°E) | A95<br>(°) | Distance<br>(°) | Subsystem (Stage)      | Age<br>(Ma) | ±<br>(Myr) | Age Range<br>Max    Min | 1234567 Q | Reference(s)                                                    |
|--------------------------------------------|--------|--------------|---------------|---------------|----------------|------------|-----------------|------------------------|-------------|------------|-------------------------|-----------|-----------------------------------------------------------------|
| <b>East Gondwana-Land</b>                  |        |              |               |               |                |            |                 |                        |             |            |                         |           |                                                                 |
| <i>Australia</i>                           |        |              |               |               |                |            |                 |                        |             |            |                         |           |                                                                 |
| Hugh River Shale (previous)*               | Emb72  | 11.2         | 37.2          | 56.8          | 12.1           | 6.8        |                 | Ordian-Boomerangian    |             |            | 520    501              | 1000111 4 | Embleton (1972)                                                 |
| Hugh River shale, Jay Creek limestone      | HR/JC  | -19.3        | 39.1          | 26.2          | 13.3           | 10.0       | 21.2            | Ordian-Boomerangian    |             |            | 520    501              | 1110111 6 | This study                                                      |
| Todd River dolomite, Allua Fm., Eninta Fm. | Todd   | -43.2        | 339.9         | -10.9         | 332.1          | 5.9        | 69.6            | Tommotian-Atdabanian   |             |            | 526    519              | 1111111 7 | (Kirschvink, 1978)                                              |
| Aroona Dam sediments                       | Aroo   | -26.0        | 33.0          | 19.5          | 7.2            | 16.5       | 28.6            | late Botomian-Toyonian |             |            | 517    513              | 1000011 3 | (Embleton and Giddings, 1974)                                   |
| Arumbera sandstone (Upper)                 | uAr    | -46.6        | 337.4         | -14.7         | 332.8          | 3.5        | 72.5            | early Early Cambrian   |             |            | 542    526              | 1111111 7 | (Kirschvink, 1978)                                              |
| Arumbera (Lower), Pertatataka Fm. (Upper)  | lAr    | -44.3        | 341.9         | -11.0         | 334.0          | 10.2       | 68.7            | upper Ediacaran        |             |            | 580    542              | 1111111 7 | (Grey and Corkeron, 1998; Kirschvink, 1978)                     |
| <i>Antarctica (Mawsonland)</i>             |        |              |               |               |                |            |                 |                        |             |            |                         |           |                                                                 |
| Zanuck granite                             | Zanu   | -7.1         | 38.8          | 39.8          | 19.0           | 7.7        | 8.2             |                        |             |            | 516    513              | 1110001 4 | (Grunow and Encarnacion, 2000)                                  |
| Wyatt Ackerman Mt. Paine tonalite          | Wyatt  | 1.1          | 39.3          | 47.4          | 14.7           | 4.0        | 0.0             |                        | 526, 524    | 2,2        | 528    522              | 1110111 6 | (Encarnacion and Grunow, 1996;<br>Grunow and Encarnacion, 2000) |
| <b>West Gondwana-Land</b>                  |        |              |               |               |                |            |                 |                        |             |            |                         |           |                                                                 |
| <i>Africa' (Congo and Kalahari)</i>        |        |              |               |               |                |            |                 |                        |             |            |                         |           |                                                                 |
| Sinyai metadolerite                        | Sin    | -29.0        | 319.0         | -23.2         | 315.2          | 3.9        | 88.5            |                        | 547         | 4          | 551    543              | 1110101 5 | (Meert and Van der Voo, 1996)                                   |
| Ntonya ring structure                      | Nton   | 27.8         | 344.9         | 30.4          | 347.7          | 1.8        | 26.8            |                        | 522         | 13         | 535    509              | 1110111 6 | (Briden et al, 1993)                                            |
| <i>Madagascar</i>                          |        |              |               |               |                |            |                 |                        |             |            |                         |           |                                                                 |
| Carion granite                             | Carion | -7.0         | 1.0           | 8.2           | 356.9          | 11.0       | 42.0            |                        | 508.5       | 11.5       | 520    497              | 1110011 5 | (Meert et al., 2003)                                            |
| Madagascar virgation zone                  | MadV   | -7.0         | 353.0         | 7.8           | 348.5          | 14.0       | 45.5            |                        | 521.4       | 11.9       | 533.3    509.5          | 1110011 5 | (Meert et al., 2001)                                            |
| <i>South America</i>                       |        |              |               |               |                |            |                 |                        |             |            |                         |           |                                                                 |
| Itabaiana Dikes                            | Itabai | 34.9         | 314.6         | 34.7          | 334.8          | 7.3        | 32.2            |                        | 525         | 5          | 530    520              | 1111111 7 | (Trindade et al., 2006)                                         |
| Sierra de las Animas 1                     | SA1    | 6            | 338           | 24.1          | 12.1           | 22.9       | 23.4            |                        | 510         | 10         | 520    500              | 1110111 6 | (Sanchez-Bettucci and Rapalini, 2002)                           |
| Sierra de las Animas 2                     | SA2    | -17          | 251           | -41.9         | 307.3          | 18.5       | 107.4           |                        | 551         | 10         | 561    541              | 1010101 4 | (Sanchez-Bettucci and Rapalini, 2002)                           |

\*Not plotted in Figure 3.



## References

- Briden, J.C., and McClelland, E., 1993, Proving the age of a paleomagnetic pole: The case of the Ntonya ring structure, Malawi: *Journal of Geophysical Research*, v. 98, p. 1743-1749.
- Embleton, B.J., 1972, The Paleomagnetism Of Some Proterozoic-Cambrian Sediments From Amadeus-Basin, Central-Australia: *Earth And Planetary Science Letters*, v. 17, p. 217-226.
- Embleton, B.J., and Giddings, J.W., 1974, Role Of Paleomagnetism In Assessing Continental Integrity: *Geoexploration*, v. 12, p. 221-222.
- Encarnacion, J., and Grunow, A.M., 1996, Changing magmatic and tectonic styles along the paleo-Pacific margin of Gondwana and the onset of early Paleozoic magmatism in Antarctica: *Tectonics*, v. 15, p. 1325-1341.
- Gravestock, D.I., and Shergold, J.H., 2001, Australian Early and Middle Cambrian Sequence Biostratigraphy with Implications for Species Diversity and Correlation, *in* Zhuravlev, A.Y., and Riding, R., eds., *The Ecology of the Cambrian Radiation*: New York, NY, Columbia University Press, p. 107-136.
- Grey, K., and Corkeron, M., 1998, Late Neoproterozoic stromatolites in glacial successions of the Kimberley region, Western Australia: evidence for a younger Marinoan glaciation: *Precambrian Research*, v. 92, p. 65-87.
- Grunow, A.M., 1995, Implications for Gondwana of new Ordovician paleomagnetic data from igneous rocks in southern Victoria Land, East Antarctica: *Journal of Geophysical Research*, v. 100, p. 12589-12603.
- Grunow, A.M., and Encarnacion, J., 2000, Terranes or Cambrian polar wander: New data from the Scott Glacier area, Transantarctic Mountains, Antarctica: *Tectonics*, v. 19, p. 168-181.
- Kennard, J.M., and Lindsay, J.F., 1991, Sequence stratigraphy of the latest Proterozoic-Cambrian Pertaoorta Group, northern Amadeus Basin, central Australia, *in* Korsch, R.J., and Kennard, J.M., eds., *Geological & Geophysical Studies in the Amadeus Basin, Central Australia*, Volume Bulletin 236: Canberra, Bureau of Mineral Resources, p. 171-194.
- Kirschvink, J.L., 1978, The Precambrian-Cambrian boundary problem: Paleomagnetic directions from the Amadeus Basin, central Australia: *Earth and Planetary Science Letters*, v. 40, p. 91-100.
- , 1980, The least-squares line and plane and the analysis of paleomagnetic data: *Geophysical Journal of the Royal Astronomical Society*, v. 62, p. 699-718.
- Klootwijk, C.T., 1980, Early Paleozoic Paleomagnetism In Australia.1. Cambrian Results From The Flinders Ranges, South-Australia.2. Late Early Cambrian Results From Kangaroo Island, South-Australia.3. Middle To Early Late Cambrian Results From The Amadeus Basin, Northern-Territory: *Tectonophysics*, v. 64, p. 249-332.
- Maloof, A.C., Schrag, D.P., Crowley, J.L., and Bowring, S.A., 2005, An expanded record of Early Cambrian carbon cycling from the Anti-Atlas Margin, Morocco: *Canadian Journal of Earth Sciences*, v. 42, p. 2195-2216.
- Meert, J., and Van der Voo, R., 1996, Paleomagnetic and  $^{40}\text{Ar}/^{39}\text{Ar}$  Study of the Sinyai Dolerite, Kenya: Implications for Gondwana Assembly: *Journal of Geology*, v. 104, p. 131-142.

- Meert, J.G., Nedelec, A., and Hall, C., 2003, The stratoid granites of central Madagascar: paleomagnetism and further age constraints on neoproterozoic deformation: *Precambrian Research*, v. 120, p. 101-129.
- Meert, J.G., Nedelec, A., Hall, C., Wingate, M.T.D., and Rakotondrazafy, M., 2001, Paleomagnetism, geochronology and tectonic implications of the Cambrian-age Carion granite, Central Madagascar: *Tectonophysics*, v. 340, p. 1-21.
- Paulsen, T.S., Encarnacion, J., Grunow, A.M., Layer, P.W., and Watkeys, M.K., 2007, New age constraints for a short pulse in Ross orogen deformation triggered by East-West Gondwana suturing: *Gondwana Research*, v. 12, p. 417-427.
- Sanchez-Bettucci, L., and Rapalini, A.E., 2002, Paleomagnetism of the Sierra de Las Animas Complex, southern Uruguay: its implications in the assembly of western Gondwana: *Precambrian Research*, v. 118, p. 243-265.
- Trindade, R.I.F., D'Agrella, M.S., Epof, I., and Neves, B.B.B., 2006, Paleomagnetism of Early Cambrian Itabaiana mafic dikes (NE Brazil) and the final assembly of Gondwana: *Earth And Planetary Science Letters*, v. 244, p. 361-377.
- Van der Voo, R., 1990, The reliability of paleomagnetic data: *Tectonophysics*, v. 184, p. 1-9.
